# Supplementary material for: Kinetics-driven high power Li-ion battery with a-Si/NiSix core-shell nanowire anodes
Source: Royal Society of Chemistry journal article supplement (doi:10.1039/c0sc00628a), 2011-01-01
Supplement: c0sc00628a.pdf [file c0sc00628a.pdf]

# Supporting Information for “Kinetics-Driven High Power Li-ion Battery with $\alpha$ -Si/NiSi<sub>x</sub> Core-Shell Nanowire Anodes”

*Kibum Kang*<sup>1</sup>, *Kyeong-Se Song*,<sup>3</sup> *Hoseok Heo*,<sup>2</sup> *Sunyoung Yoo*<sup>1</sup>, *Gil-Sung Kim*,<sup>1</sup> *Geunhee Lee*, *Yong-Mook Kang*,<sup>3,\*</sup> and *Moon-Ho Jo*<sup>1,2,\*</sup>

<sup>1</sup>Department of Materials Science and Engineering and <sup>2</sup>Division of Advanced Materials Science, Pohang University of Science and Technology (POSTECH), San 31, Hyoja-Dong, Nam Gu, Pohang, Gyungbuk 790-784, Korea, <sup>3</sup>Division of Advanced Materials Engineering, Kongju National University, 275 Budae-Dong, Cheonan, Chungnam 330-717, Korea

\*E-mail: Moon-Ho Jo; [mhjo@postech.ac.kr](mailto:mhjo@postech.ac.kr), Yong-Mook Kang; [dake1234@kongju.ac.kr](mailto:dake1234@kongju.ac.kr)

## **c-Si/NiSi<sub>x</sub> NWs**

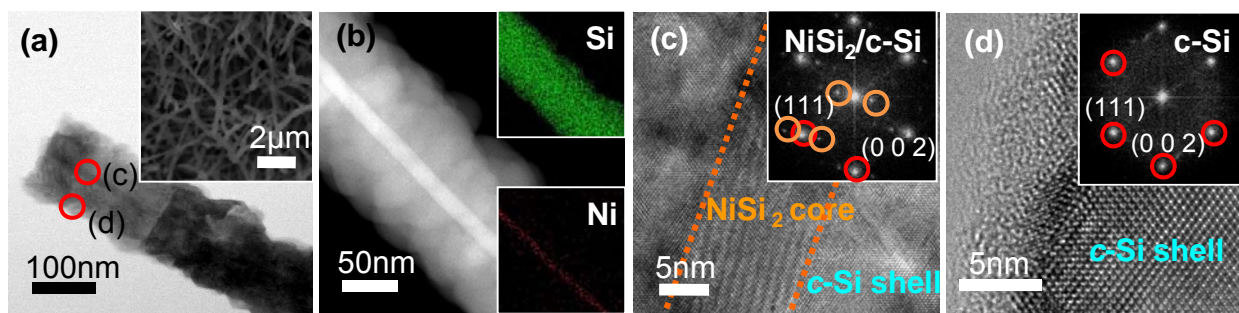

**Figure S1** (a) TEM image of an individual *c*-Si /NiSi<sub>x</sub> NW. The inset shows a plan-view SEM image of *c*-Si/NiSi<sub>x</sub> NW grown on SUS substrate. (b) HAADF image of a *c*-Si/NiSi<sub>x</sub> NW and EDX elemental mapping images (inset). (c) HRTEM image of an individual *c*-Si/NiSi<sub>x</sub> NW at the core region and the corresponding FFT-DP along the [1-10] zone axis (inset). The spot in orange color circle arise from the interface-twin boundary between *c*-Si and NiSi<sub>2</sub> (d) HRTEM image of an individual *c*-Si/NiSi<sub>x</sub> NW at the shell region and the corresponding FFT-DP along the [1-10] zone axis (inset).

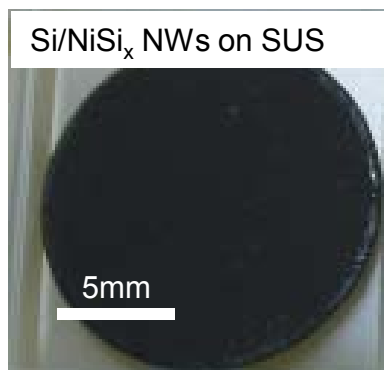

**Figure S2** A photograph of the *a*-Si/NiSi<sub>x</sub> NW grown on the whole SUS substrate of 15 Φ diameter.

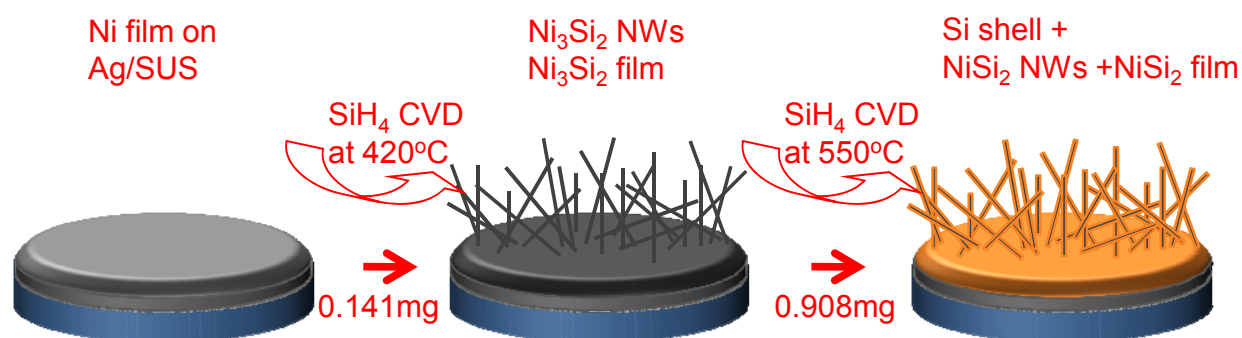

- Phase of Ni-silicide after SiH<sub>4</sub> reactions
  - SiH<sub>4</sub> CVD on Ni at 420°C → Ni<sub>3</sub>Si<sub>2</sub> NWs and Ni<sub>3</sub>Si<sub>2</sub> film
  - SiH<sub>4</sub> CVD on Ni<sub>3</sub>Si<sub>2</sub> NWs and Ni<sub>3</sub>Si<sub>2</sub> film at 550°C → Si Shell, NiSi<sub>2</sub> NWs and NiSi<sub>2</sub> film
- Average mass change
  - SiH<sub>4</sub> CVD on Ni film at 420°C for Ni<sub>3</sub>Si<sub>2</sub> NW growth : 0.141mg
  - SiH<sub>4</sub> CVD on Ni<sub>3</sub>Si<sub>2</sub> NWs and Ni<sub>3</sub>Si<sub>2</sub> film at 550°C for Si shell deposition: 0.908mg
- Additional mass due to phase transition
  - Ni → Ni<sub>3</sub>Si<sub>2</sub> NWs + Ni<sub>3</sub>Si<sub>2</sub> film : 0.141mg
  - From this result estimated additional mass due to phase transition
  - Ni<sub>3</sub>Si<sub>2</sub> NWs + Ni<sub>3</sub>Si<sub>2</sub> film → NiSi<sub>2</sub> NWs + NiSi<sub>2</sub> film : 0.282mg
- Mass calculation of the Si Shell
  - 0.908mg = Si Shell + additional mass due to phase transition + other silicide reaction

Phase transition mass from Ni<sub>3</sub>Si<sub>2</sub> to NiSi<sub>2</sub> is 0.282mg,  
Therefore mass of Si shell is 0.626mg

We finally normalized the specific capacity of Si/Ni-silicide NW anode using the mean value of the expected mass of Si shell, 0.626mg.

**Figure S3** Explanation of the normalization method for calculating the gravimetric capacity.

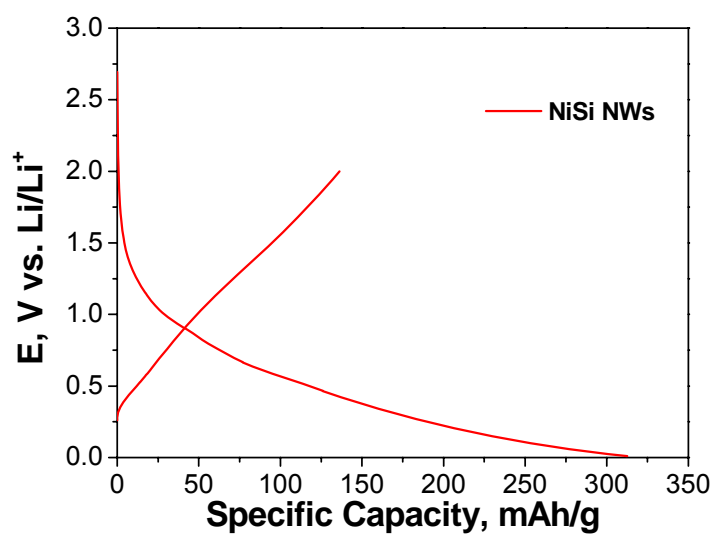

**Figure S4** The current charge/discharge curve for the 1<sup>st</sup> cycle of the NiSi<sub>x</sub> NW cell in the galvanostatic mode.
